# Supplementary material for: A study on the structure, luminescence and thermo-stability of polycrystalline Gd2Si2O7:Ce and (Gd,La)2Si2O7:Ce
Source: Royal Society of Chemistry journal article supplement (doi:10.1039/c6tc04484k), 2017-01-01
Supplement: c6tc04484k1.pdf [file c6tc04484k1.pdf]

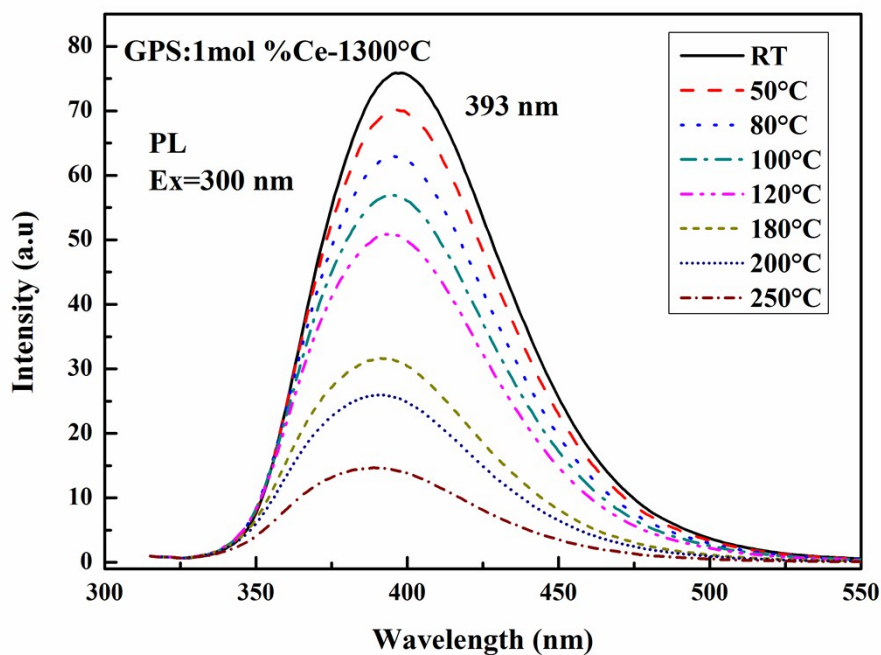

Figure S 1 The emission spectra of GPS:Ce-1300°C powders under different testing temperatures (RT to 250°C) ( $\lambda_{ex} = 300\text{nm}$ )

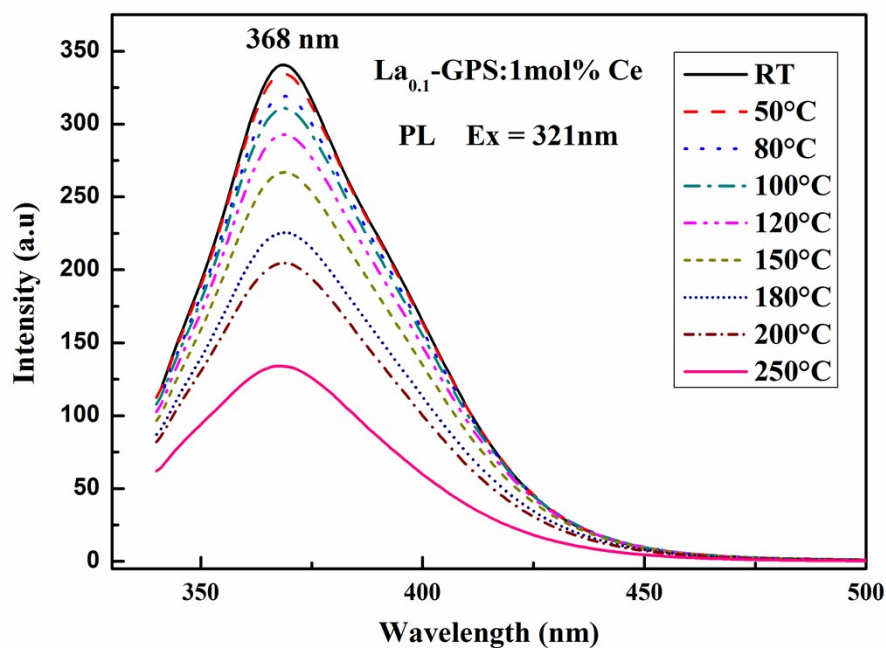

Figure S 2 The emission spectra of La-GPS:Ce powders under different testing temperatures (RT to 250°C) ( $\lambda_{ex} = 321\text{nm}$ )

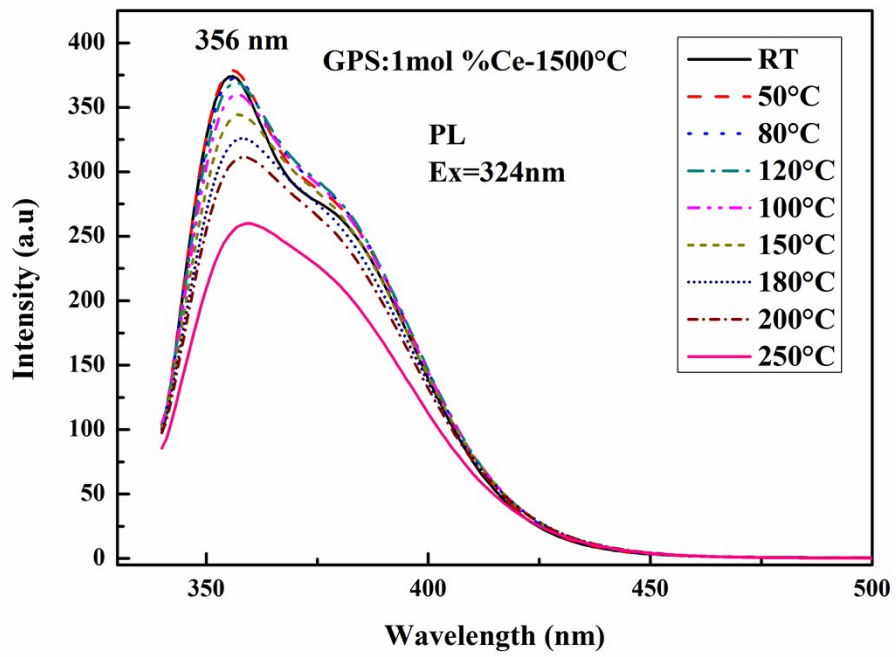

Figure S 3 The emission spectra of GPS:Ce-1500°C powders under different testing temperatures (RT to 250°C) ( $\lambda_{ex} = 324\text{nm}$ )
